# Supplementary material
Source: PubMed Central journal article supplement (PMC7176927)
Supplement: mmc1.pdf [file mmc1.pdf]

# THE LANCET

## Neurology

### Supplementary appendix

This appendix formed part of the original submission and has been peer reviewed.  
We post it as supplied by the authors.

Supplement to: Zhao H, Shen D, Zhou H, Liu J, Chen S. Guillain-Barré syndrome associated with SARS-CoV-2 infection: causality or coincidence?. *Lancet Neurol* 2020; published online April 1. [https://doi.org/10.1016/S1474-4422\(20\)30109-5](https://doi.org/10.1016/S1474-4422(20)30109-5).

**Contributors:** The first author HZ received specialty training in the clinical management of neuroimmune disorders in Ruijin Hospital in 2018. He has kept in touch with us on some challenging and interesting cases after he was back to Jingzhou Central Hospital. HZ treated the patient and collected the clinical information. DDS drafted the manuscript. HYZ did the NCS analysis. JL and SC provided guidance for the diagnosis and clinical management of the patient. All authors contributed to editing of the manuscript and approved the final version.
